# Supplementary material for: Comparison of therapeutic effects of different mesenchymal stem cells on rheumatoid arthritis in mice
Source: PeerJ. 2019 Jun 3;7:e7023. doi: 10.7717/peerj.7023 (PMC6553443; doi:10.7717/peerj.7023)
Supplement: Supplemental Information 2 — The histological score evaluated from each mouse was shown in this table. [file peerj-07-7023-s002.xlsx]

## Sheet: Sheet1
	CIA	UC	BMSC	SHED
	4	2	2	2
	4	2	2	3
	3	2	2	4
	4	1	2	3
	4	2	2	3
	4	2	3	3
Mean	3.83333	1.83333	2.16667	3
SD	3.83333	0.408248	0.408248	0.632455
