# Supplementary material for: Comparison of therapeutic effects of different mesenchymal stem cells on rheumatoid arthritis in mice
Source: PeerJ. 2019 Jun 3;7:e7023. doi: 10.7717/peerj.7023 (PMC6553443; doi:10.7717/peerj.7023)
Supplement: Supplemental Information 3 — The Disease Severity Score evaluated from each mouse at each time point was shown in this table. [file peerj-07-7023-s003.xlsx]

## Sheet: Sheet1
CIA							Mean	SD		UC							Mean	SD		BMSC							Mean	SD		SHED							Mean	SD
0d	16	16	14	13	13	13	14.1667	1.47196		0d	14	13	15	15	14	16	14.5	1.04881		0d	16	15	12	14	13	14	14	1.41421		0d	16	14	13	16	15	14	14.6667	1.21106
3d	16	16	14	13	13	13	14.1667	1.47196		3d	14	13	15	15	14	16	14.5	1.04881		3d	16	15	12	14	13	14	14	1.41421		3d	16	14	13	16	15	14	14.6667	1.21106
6d	16	16	14	13	13	13	14.1667	1.47196		6d	13	13	15	15	14	16	14.3333	1.21106		6d	16	15	12	14	13	14	14	1.41421		6d	16	14	13	16	15	14	14.6667	1.21106
9d	16	16	14	13	13	13	14.1667	1.47196		9d	12	11	13	14	10	14	12.3333	1.63299		9d	14	13	10	14	12	12	12.5	1.51658		9d	16	12	11	14	14	13	13.3333	1.75119
12d	16	15	14	13	13	13	14	1.26491		12d	10	11	13	12	10	12	11.3333	1.21106		12d	13	12	9	13	12	11	11.6667	1.50555		12d	14	12	11	14	13	12	12.6667	1.21106
15d	15	15	14	13	13	13	13.8333	0.983192		15d	10	9	11	12	10	10	10.3333	1.0328		15d	13	12	9	11	10	11	11	1.41421		15d	14	12	11	14	13	11	12.5	1.3784
18d	15	15	14	13	13	13	13.8333	0.983192		18d	9	9	9	8	9	8	8.66667	0.516398		18d	11	11	9	11	10	10	10.3333	0.816497		18d	14	12	11	14	13	11	12.5	1.3784
21d	15	15	14	13	12	13	13.6667	1.21106		21d	9	7	8	8	9	8	8.16667	0.752773		21d	11	11	8	10	10	10	10	1.09545		21d	14	10	11	13	11	11	11.6667	1.50555
24d	15	14	14	12	12	13	13.3333	1.21106		24d	8	7	8	7	7	8	7.5	0.547723		24d	10	10	8	10	9	9	9.33333	0.816497		24d	14	10	10	13	11	11	11.5	1.64317
27d	15	14	14	12	12	13	13.3333	1.21106		27d	8	7	7	7	7	8	7.33333	0.516398		27d	10	10	8	9	9	9	9.16667	0.752773		27d	12	10	10	13	11	11	11.1667	1.16905
30d	15	14	14	12	12	13	13.3333	1.21106		30d	8	7	7	7	7	8	7.33333	0.516398		30d	10	10	8	9	9	9	9.16667	0.752773		30d	12	10	10	13	11	11	11.1667	1.16905
