# Supplementary material for: Comparison of therapeutic effects of different mesenchymal stem cells on rheumatoid arthritis in mice
Source: PeerJ. 2019 Jun 3;7:e7023. doi: 10.7717/peerj.7023 (PMC6553443; doi:10.7717/peerj.7023)
Supplement: Supplemental Information 4 — The absorbance value under 450 nm evaluated from each mouse was shown in this table. [file peerj-07-7023-s004.xlsx]

## Sheet: Sheet1
	CIA	UC	BMSC	SHED
	794	589	689	716
	754	639	715	743
	811	612	692	751
	759	632	671	722
	783	643	657	739
	764	667	722	741
Mean	777.5	630.333	691	735.333
SD	22.3674	26.9345	24.8918	13.4263
