# Supplementary material for: Comparison of therapeutic effects of different mesenchymal stem cells on rheumatoid arthritis in mice
Source: PeerJ. 2019 Jun 3;7:e7023. doi: 10.7717/peerj.7023 (PMC6553443; doi:10.7717/peerj.7023)
Supplement: Supplemental Information 6 — The percentage of positive staining area in IHC-P of the hind limb ankle joint from each mouse was shown in this table. [file peerj-07-7023-s006.xlsx]

## Sheet: Sheet1
	CIA	UC	BMSC	SHED
	27.705	12.002	17.479	21.861
	24.145	14.196	19.194	19.529
	26.575	16.649	18.638	19.361
	22.149	14.999	18.592	20.621
	24.828	13.516	17.619	22.913
	27.475	15.913	18.371	20.729
Mean	25.4795	14.5458	18.3155	20.8357
SD	2.16484	1.68237	0.654239	1.36427
