# Supplementary material for: Comparison of therapeutic effects of different mesenchymal stem cells on rheumatoid arthritis in mice
Source: PeerJ. 2019 Jun 3;7:e7023. doi: 10.7717/peerj.7023 (PMC6553443; doi:10.7717/peerj.7023)
Supplement: Supplemental Information 7 — The percentage of positive staining area in IHC-P of the hind limb ankle joint from each mouse was shown in this table. [file peerj-07-7023-s007.xlsx]

## Sheet: Sheet1
	CIA	UC	BMSC	SHED
	3.63	1.093	1.945	2.675
	3.619	1.912	2.218	2.182
	3.913	1.529	2.391	2.713
	2.962	1.138	2.113	2.819
	3.019	1.821	2.281	3.015
	2.972	1.392	1.782	2.589
Mean	3.3525	1.48083	2.12167	2.6655
SD	0.417297	0.340523	0.22533	0.278454
